# Supplementary material for: Enzymatic synthesis of chiral γ-amino acids using ω-transaminase
Source: Royal Society of Chemistry journal article supplement (doi:10.1039/c3cc44864a), 2014-08-27
Supplement: c3cc44864a1.pdf [file c3cc44864a1.pdf]

1  
2  
3  
4  
5  
6  
7  
8  
9  
10  
11  
12  
13  
14  
15  
16  
17  
18  
19  
20  
21  
22  
23  
24  
25  
26  
27  
28  
29  
30  
31  
32  
33  
34

## Electronic Supplementary Information

### Enzymatic synthesis of chiral $\gamma$ -amino acids using $\omega$ -transaminase

**Minsu Shon**, <sup>a†</sup> **Ramachandran Shanmugavel**, <sup>b†</sup> **Giyoung Shin**, <sup>a</sup> **Sam Mathew**, <sup>a</sup> **Sang-Hyeup Lee**, <sup>b\*</sup> **Hyungdon Yun** <sup>c\*</sup>

<sup>a</sup> *School of Biotechnology, Yeungnam University, Gyeongsan, Gyeongbuk, South Korea.*

<sup>b</sup> *Department of Life Chemistry, Catholic University of Daegu, Gyeongbuk 700-443, Korea. E-mail: [leeshh@cu.ac.kr](mailto:leeshh@cu.ac.kr)*

<sup>c</sup> *Department of Bioscience & Biotechnology, Konkuk University, Seoul 143-701, Korea. Fax: +82-2-450-0686; Tel: +82-2-450-0496; E-mail: [hyungdon@konkuk.ac.kr](mailto:hyungdon@konkuk.ac.kr)*

<sup>†</sup> *These authors contributed equally to this work*

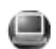

## 1 **1. Materials**

2 Glucose dehydrogenase from *Pseudomonas* sp., L-Lactate dehydrogenase from rabbit muscle,  
3 pyridoxal 5'-phosphate hydrate (PLP), and  $\beta$ -Nicotinamide adenine dinucleotide (NADH) were  
4 purchased from Sigma-Aldrich, Korea. All other chemicals used were of analytical or reagent  
5 grade.

6

## 7 **2. Enzyme expression and purification**

8  $\omega$ -TA from *Polaromonas* sp. JS666 ((*S*)- $\omega$ -TAPO) was expressed and purified as described  
9 elsewhere.<sup>[1]</sup> To express  $\omega$ -TABG with a His-tagged polypeptide, the coding region of the  
10 enzyme was amplified by PCR using the primers P1 (5'  
11 CGCCATATGACGACGTCGATTCTTCCCGAAACG-3') and P2 (5'-  
12 CCCAAGCTTGCGATCCGAATTATCGTCGCG-3') from the genomic DNA of *Burkholderia*  
13 *graminis* C4D1M. The PCR product was digested with *Nde*I and *Hind*III and inserted into the  
14 IPTG-inducible expression vector pET24ma.<sup>[1]</sup> The plasmid was then introduced into *E. coli*  
15 (BL21) and the transformants were grown at 37°C in 1L LB broth containing 100  $\mu$ g mL<sup>-1</sup> of  
16 kanamycin. When the OD<sub>600</sub> reached 0.6, IPTG was added to a final concentration of 0.5 mM.  
17 The culture media was then immediately cooled to 20°C and incubated at the same temperature  
18 at 250 rpm. After overnight induction, the cells were harvested and washed twice with 50 mM  
19 phosphate buffer (pH 8.0). Following centrifugation, the cell pellet was resuspended in 2  
20 volumes of 20 mM phosphate buffer (pH 7.0) containing 20  $\mu$ M pyridoxal 5'-phosphate (PLP), 1  
21 mM PMSF, 300 mM NaCl and 5 mM imidazole. The cells were then subjected to ultrasonic  
22 disruption for 15 min, after which the protein was purified at 4°C on a Ni-NTA agarose resin  
23 obtained from Qiagen (Hilden, Germany). The crude extract was passed directly into a column  
24 containing 3 mL of Ni-NTA agarose resin and then washed with 50 mL of phosphate buffer (pH  
25 8.0) containing 20 mM imidazole, after which the protein was eluted with phosphate buffer (pH  
26 8.0) containing 250 mM imidazole. The eluted solution containing purified protein was dialyzed  
27 against 100 mM potassium phosphate buffer (pH 8.0) containing 20  $\mu$ M PLP, 0.2 mM EDTA,  
28 and 0.2% mercaptoethanol and then concentrated using an Amicon PM-10 ultrafiltration unit.  
29 Glycerol was added to the purified enzyme solution (final 40% glycerol) and the samples were  
30 stored at -20°C until further analysis.

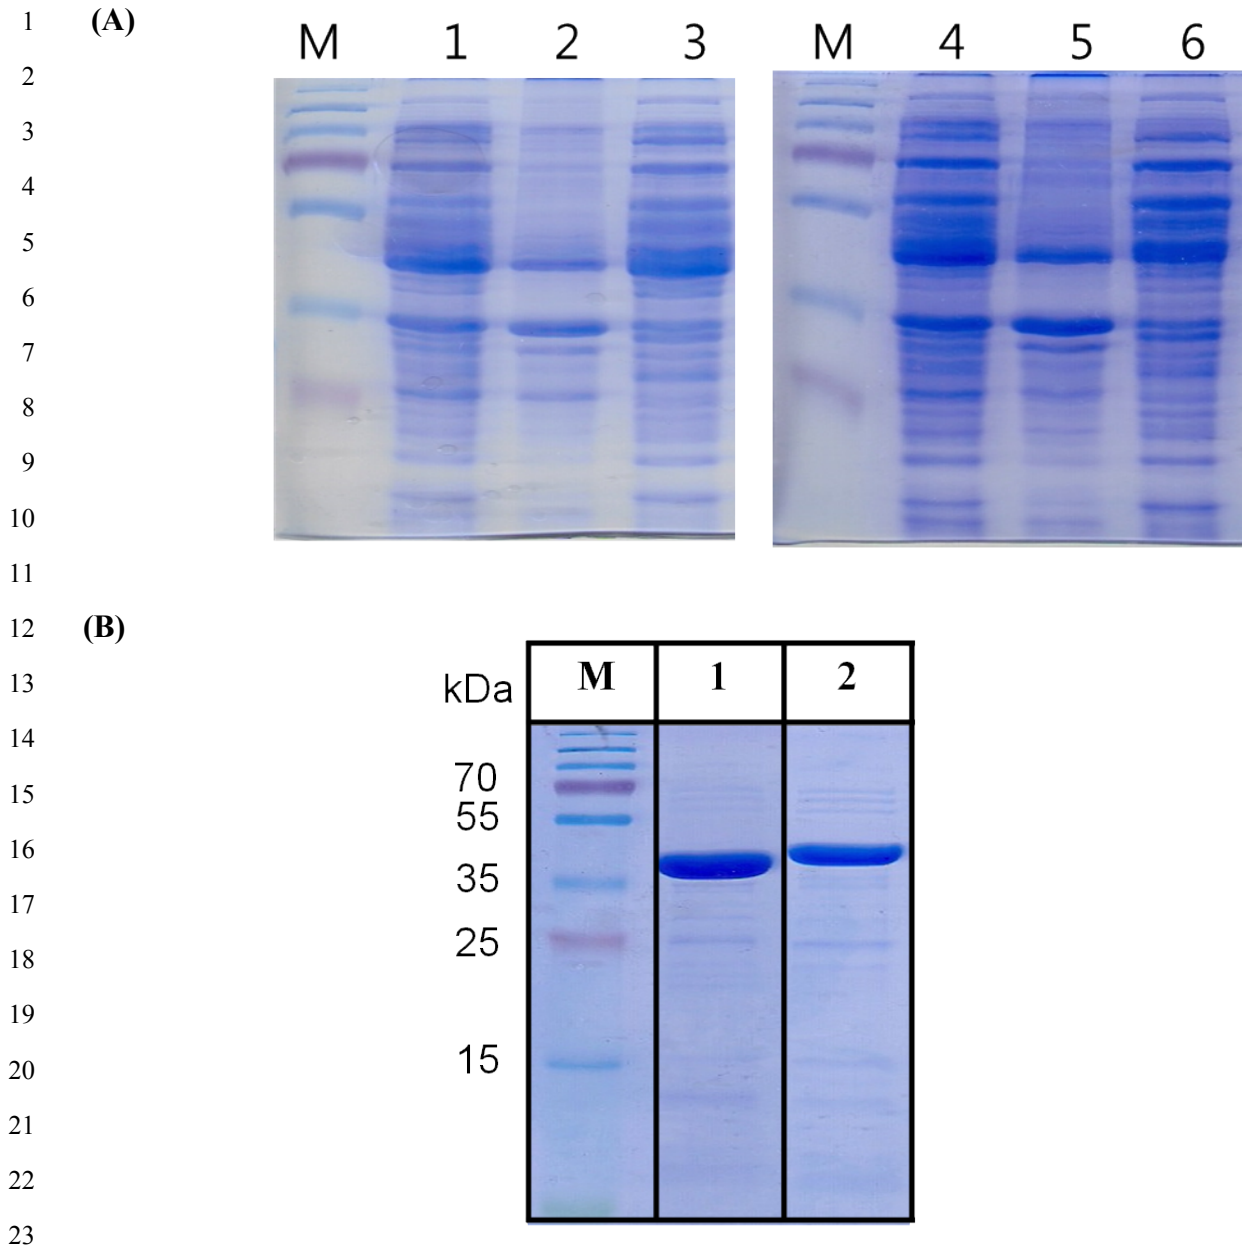

24 **Figure S1.** (A) SDS-PAGE analysis of expression of  $\omega$ -TAs. Lane M; Molecular weight  
 25 marker, lane 1; total cell of recombinant *E. coli* BL21 over-expressing  $\omega$ -TAPO (48.5kDa); lane  
 26 2, insoluble fraction for  $\omega$ -TAPO, lane 3; soluble fraction for  $\omega$ -TAPO lane 4; total cell of  
 27 recombinant *E. coli* BL21 over-expressing  $\omega$ -TABG (50.2kDa); lane 5, insoluble fraction  $\omega$ -  
 28 TABG, lane 6; soluble fraction for  $\omega$ -TABG. (B) SDS-PAGE analysis of purified  $\omega$ -TAs. Lane  
 29 M; Molecular weight marker, lane 1;  $\omega$ -TAPO (48.5kDa), lane 2;  $\omega$ -TABG (50.2kDa).

30

1 **3. Synthesis of *rac*- $\gamma$ -amino acids (1a-g)**

2

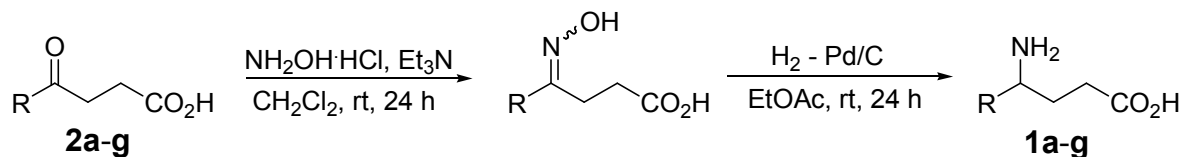

6

7 **3.1 General experimental procedure for the synthesis of *rac*-4-amino-4-phenylbutanoic acid**  
8 **(1a, R = Ph).**<sup>[2]</sup>

9 Triethylamine (2.12 g, 21 mmol) was added to an ice-cooled (0-5°C) solution of **2a** (2.67 g, 15  
10 mmol) in dry CH<sub>2</sub>Cl<sub>2</sub> (20 mL). Hydroxylamine hydrochloride (1.14 g, 16.5 mmol) was then  
11 added slowly and the reaction mixture was stirred at room temperature overnight. The progress  
12 of the reaction was monitored by TLC. After completion of the reaction, the reaction mixture  
13 was extracted with 10% sodium bicarbonate solution (2 x 50 mL). The combined aqueous extract  
14 was washed with diethyl ether, and then acidified to pH = 2 using concentrated hydrochloric  
15 acid. This mixture was then extracted with ethyl acetate (3 x 75 mL). The combined organic  
16 extracts were washed with water and brine, dried over MgSO<sub>4</sub> and concentrated *in vacuo* to give  
17 the crude oxime intermediate (2.02 g, 10.5 mmol, 70%). Without further purification, this crude  
18 oxime (0.57 g, 3 mmol) was dissolved in ethyl acetate (50 mL) and then hydrogenated (H<sub>2</sub>  
19 balloon) using 10% Pd/C catalyst (0.25 g on dry basis) at room temperature for 24 hrs. The  
20 reaction mixture was filtered through a pad of celite. The celite layer was washed with mixture  
21 of hot methanol and water (1:1). The combined filtrate was concentrated *in vacuo*, to provide the  
22 crude residue. This was then purified by recrystallization (water-methanol) to provide the *rac*-4-  
23 amino-4-phenylbutanoic acid (**1a**) (0.42 g, 2.37 mmol, 79%) as a white crystalline solid.

24

25 **4-Amino-4-phenylbutanoic acid (1a).** yield (over two step): 55%; <sup>1</sup>H NMR (400 MHz, D<sub>2</sub>O):  $\delta$   
26 7.38-7.21 (m, 5H), 4.17 (dd, *J* = 5.8, 8.6 Hz, 1H), 2.18-1.80 (m, 2H), 1.93 (t, *J* = 7.4 Hz, 2H);  
27 <sup>13</sup>C NMR (100 MHz, D<sub>2</sub>O):  $\delta$  181.2, 136.0, 129.5, 129.5, 127.4, 55.3, 33.6, 30.3; HRMS (EI+):  
28 *m/z* 179.0944 [*M*]<sup>+</sup>, calcd for C<sub>10</sub>H<sub>13</sub>NO<sub>2</sub> 179.0946.

1 **4-Amino-4-(*p*-tolyl)butanoic acid (1b).** yield (over two step): 69%; <sup>1</sup>H NMR (400 MHz, D<sub>2</sub>O):  
2 δ 7.45-7.15 (m, 4H), 4.30 (s, 1H), 2.35 (s, 3H), 2.30-2.00 (m, 4H); <sup>13</sup>C NMR (100 MHz, D<sub>2</sub>O): δ  
3 181.2, 139.9, 133.0, 130.0, 127.4, 55.1, 33.6, 30.2, 20.4; HRMS (EI+): *m/z* 193.1104 [M]<sup>+</sup>, calcd  
4 for C<sub>11</sub>H<sub>15</sub>NO<sub>2</sub> 193.1103.

5

6 **4-Amino-4-(4-methoxyphenyl)butanoic acid (1c).** yield (over two step): 76%; <sup>1</sup>H NMR (400  
7 MHz, D<sub>2</sub>O): δ 7.27-7.21 (m, 2H), 6.95-6.86 (m, 2H), 4.18 (q, *J* = 5.6 Hz, 1H), 3.70 (s, 3H) 2.20-  
8 1.80 (m, 4H); <sup>13</sup>C NMR (100 MHz, D<sub>2</sub>O): δ 181.2, 159.6, 129.0, 128.4, 114.8, 55.6, 54.8, 33.7,  
9 30.2; HRMS (EI+): *m/z* 209.1055 [M]<sup>+</sup>, calcd for C<sub>11</sub>H<sub>15</sub>NO<sub>3</sub> 209.1052.

10

11 **4-Amino-4-(4-chlorophenyl)butanoic acid (1d).** yield (over two step): 73%; <sup>1</sup>H NMR (400  
12 MHz, D<sub>2</sub>O): δ 7.60-7.20 (m, 4H), 4.45-4.20 (m, 1H), 2.40-2.00 (m, 4H); <sup>13</sup>C NMR (100MHz,  
13 D<sub>2</sub>O): δ 176.8, 135.3, 129.8, 129.6, 127.5, 54.8, 30.1, 28.6; HRMS (EI+): *m/z* 213.0558 [M]<sup>+</sup>,  
14 calcd for C<sub>10</sub>H<sub>12</sub>ClNO<sub>2</sub> 213.0557.

15

16 **4-Amino-4-(4-fluorophenyl)butanoic acid (1e).** yield (over two step): 63%; <sup>1</sup>H NMR (600  
17 MHz, D<sub>2</sub>O): δ 7.50-7.24 (m, 2H), 7.18-7.00 (m, 2H), 4.30-4.10 (m, 1H), 2.40-1.75 (m, 4H); <sup>13</sup>C  
18 NMR (150 MHz, D<sub>2</sub>O): δ 183.6, 165.5 (d, *J*<sub>CF</sub> = 244 Hz), 134.3, 132.0, (d, *J*<sub>CF</sub> = 9.3 Hz), 118.7,  
19 (d, *J*<sub>CF</sub> = 20.7 Hz), 57.2, 36.0, 32.7; HRMS (EI+): *m/z* 197.0850 [M]<sup>+</sup>, calcd for C<sub>10</sub>H<sub>12</sub>FNO<sub>2</sub>  
20 197.0852.

21

22 **4-Amino-4-(2,4-dimethylphenyl)butanoic acid (1f).** yield (over two step): 78%; <sup>1</sup>H NMR (400  
23 MHz, CD<sub>3</sub>OD): δ 7.30-7.25 (m, 1H), 7.24-7.06 (m, 2H), 4.62-4.56 (m, 1H), 2.35 (s, 3H), 2.29 (s,  
24 3H), 2.24-2.16 (m, 2H), 2.10-2.00 (m, 1H); <sup>13</sup>C NMR (100 MHz, CD<sub>3</sub>OH): δ 180.4, 139.8,  
25 137.3, 134.1, 132.8, 128.6, 126.2, 52.0, 35.0, 32.0, 21.0, 19.3; HRMS (EI+): *m/z* 207.1256 [M]<sup>+</sup>,  
26 calcd for C<sub>12</sub>H<sub>17</sub>NO<sub>2</sub> 207.1259.

27

28 **4-Amino-4-(2,5-dimethoxyphenyl)butanoic acid (1g).** yield (over two step): 55%; <sup>1</sup>H NMR  
29 (400 MHz, D<sub>2</sub>O): δ 6.90-6.78 (m, 2H), 6.74-6.70 (m, 1H), 4.26 (t, *J* = 7.4 Hz, 1H), 3.65 (s, 3H),  
30 3.60 (s, 3H), 2.10-2.00 (m, 2H), 1.97-1.88 (m, 2H); <sup>13</sup>C NMR (100 MHz, D<sub>2</sub>O): δ 181.0, 152.8,

1 151.7, 124.3, 115.4, 115.3, 113.1, 56.0, 55.9, 52.6, 33.7, 28.7; HRMS (EI+):  $m/z$  239.1158 [M]<sup>+</sup>,  
2 calcd for C<sub>12</sub>H<sub>17</sub>NO<sub>4</sub> 239.1158.

3

4

#### 5 **4. Enzyme assay**

6 Enzyme reactions were carried out in 1 mL of 200 mM Tris/HCl buffer (pH 7.0) containing  
7 10 mM (*S*)- $\beta$ -phenylalanine (or 10 mM *rac*- $\gamma$ -amino acids), 20 mM pyruvate, 0.1 mM PLP and  
8  $\omega$ TA (0.02 mgmL<sup>-1</sup>) for 30 min at 37°C. One unit is defined as the amount of enzyme that  
9 catalyzes depletion 1  $\mu$ mol of pyruvate. Pyruvate was analyzed using HPLC.

10

#### 11 **5. Analytical methods**

##### 12 **5.1 Analysis of $\gamma$ -amino acids and $\gamma$ -keto acids**

13 The conversion and *ee* analysis of  $\gamma$ -amino acids was performed accomplished by HPLC using  
14 a Crownpak CR(+) column (Daicel Co., Japan) at 210 nm with an elution of pH 1.5 perchloric  
15 acid solution containing 2 % methanol at a flow rate of 0.6 mLmin<sup>-1</sup>. Each enantiomer was  
16 separated by these analytical conditions except **1f** (Table S1). Quantitative chiral analysis of **1f**  
17 was performed using a C<sub>18</sub> symmetry column (Waters, MA) with a Waters HPLC system at 254  
18 nm after derivatization of the sample with GITC.<sup>[1]</sup> Separation of each enantiomer of **1f** was  
19 achieved through an isocratic elution with a mixture of 50% methanol and 50% water (0.1%  
20 TFA) at a flow rate of 1.0 mLmin<sup>-1</sup> (Table S1).  $\gamma$ -keto acids(**2a-f**) were analyzed using a C<sub>18</sub>  
21 Symmetry column (Waters, MA) with an elution mixture of 50% methanol and 50% water (0.1%  
22 TFA) at a flow rate of 1.0 mLmin<sup>-1</sup>. In the case of **2g**, a mixture of 45% methanol and 55% water  
23 (0.1% TFA) was used as eluent (Table S2).

1 **Table S1.** Retention times of  $\gamma$ -amino acids

| Substrate               | Retention time (min) <sup>a</sup> |              |
|-------------------------|-----------------------------------|--------------|
|                         | ( <i>S</i> )                      | ( <i>R</i> ) |
| <b>1a</b>               | 55                                | 73           |
| <b>1b</b>               | 65                                | 110          |
| <b>1c</b>               | 170                               | 230          |
| <b>1d</b>               | 55                                | 85           |
| <b>1e</b>               | 100                               | 190          |
| <b>1f<sup>(b)</sup></b> | 52                                | 71           |
| <b>1g</b>               | 170                               | 100          |

2 <sup>a</sup> sample was analyzed using a Crownpak CR(+) column.

3 <sup>b</sup> sample was analyzed using a C<sub>18</sub> symmetry column after GITC derivatization

4

5

6

7

8 **Table S2.** Retention times of  $\gamma$ -keto acids

| Substrate | Retention time (min) |
|-----------|----------------------|
| <b>2a</b> | 4.8                  |
| <b>2b</b> | 5.3                  |
| <b>2c</b> | 7.3                  |
| <b>2d</b> | 9.0                  |
| <b>2e</b> | 5.4                  |
| <b>2f</b> | 12.8                 |
| <b>2g</b> | 8.8                  |

## 1 **5.2 Analysis of pyruvate and acetophenone**

2 Pyruvate was analyzed using an Aminex HPX-87H HPLC column (Bio-Rad, CA) with an  
3 elution of 5 mM sulfuric acid solution at UV 210 nm. Acetophenone was analyzed using a C<sub>18</sub>  
4 Symmetry column (Waters, MA) with an elution mixture of 50% methanol and 50% water (0.1%  
5 TFA) at a flow rate of 1.0 mLmin<sup>-1</sup>.<sup>[3]</sup>

6

7



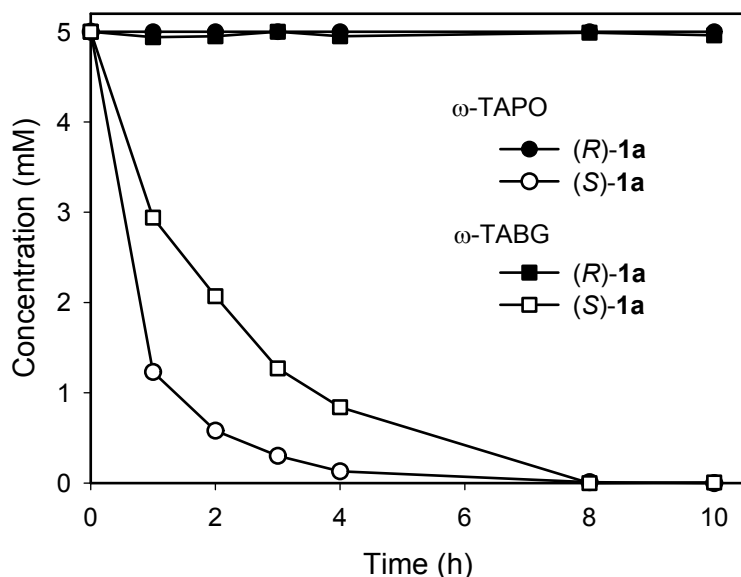

**Figure S2.** The kinetic resolution of *rac*-**1a**. Enzyme reactions were carried out in 1 mL of 200 mM Tris/HCl buffer (pH 7.0) containing 10 mM *rac*-**1a**, 20 mM pyruvate, 0.1 mM PLP by using ω-TAPO (0.02 mgmL<sup>-1</sup>) or ω-TABG(0.03 mgmL<sup>-1</sup>) at 37°C.

**Table S3.** Kinetic resolution of 10 mM β-amino acids<sup>a</sup>

| Substrate             | ωTAPO    |           |        | ωTABG    |           |        |
|-----------------------|----------|-----------|--------|----------|-----------|--------|
|                       | Time (h) | Conv. (%) | ee (%) | Time (h) | Conv. (%) | ee (%) |
| <b>1a</b>             | 8        | 50.0      | >99    | 10       | 51.4      | >99    |
| <b>1b</b>             | 10       | 50.0      | >99    | 12       | 50.2      | >99    |
| <b>1c</b>             | 20       | 50.1      | >99    | 12       | 50.0      | >99    |
| <b>1d</b>             | 14       | 50.2      | >99    | 14       | 50.2      | >99    |
| <b>1e</b>             | 14       | 50.0      | >99    | 12       | 50.3      | >99    |
| <b>1f</b>             | 10       | 11.8      | 13     | 12       | 19.0      | 23     |
| <b>1f<sup>b</sup></b> | 20       | 50.1      | >99    | 20       | 50.0      | >99    |
| <b>1g</b>             | 10       | 30.5      | 44     | 12       | 39.7      | 66     |
| <b>1g<sup>b</sup></b> | 20       | 50.1      | >99    | 24       | 50.2      | >99    |

<sup>a</sup> Enzyme reactions were carried out at 37°C in 1mL of 200 mM Tris/HCl buffer (pH 7.0) containing 10 mM γ-amino acid, 20 mM pyruvate, 0.1 mM PLP by using ωTAPO (0.02 mgmL<sup>-1</sup>) or ω-TABG (0.04 mgmL<sup>-1</sup>); Conversion and *ee* were determined by HPLC. <sup>b</sup> 0.2 mgmL<sup>-1</sup> of enzyme was used.

## 1 6. Substrate inhibition by 2a

2

3 Since the enzyme activity of aminotransferase is affected by substrate concentrations, the  
4 substrate inhibition of enzyme by **2a** was examined. To measure the substrate inhibition by **2a**,  
5 the initial rate of the enzyme reaction was analyzed with 50 mM (or 100 mM) (*S*)- $\alpha$ -MBA and  
6 various concentrations of **2a** (0-100 mM) (Fig. S3).  $\omega$ -TAPO and  $\omega$ -TABG showed similar  
7 pattern of substrate inhibition by **2a**. The reaction rate increased as the concentration of **2a** was  
8 increased up to 5 mM. However, when **2a** exceeded 5 mM, the reaction rate decreased. For  
9 example, the reaction rate of  $\omega$ -TAPO with 40 mM **2a** and 50 mM (*S*)- $\alpha$ -MBA was 19.8% of that  
10 with 5 mM **2a**.

11

12

13

14

15

16

17

18

19

20

21

22

23

24

25

26

27

28

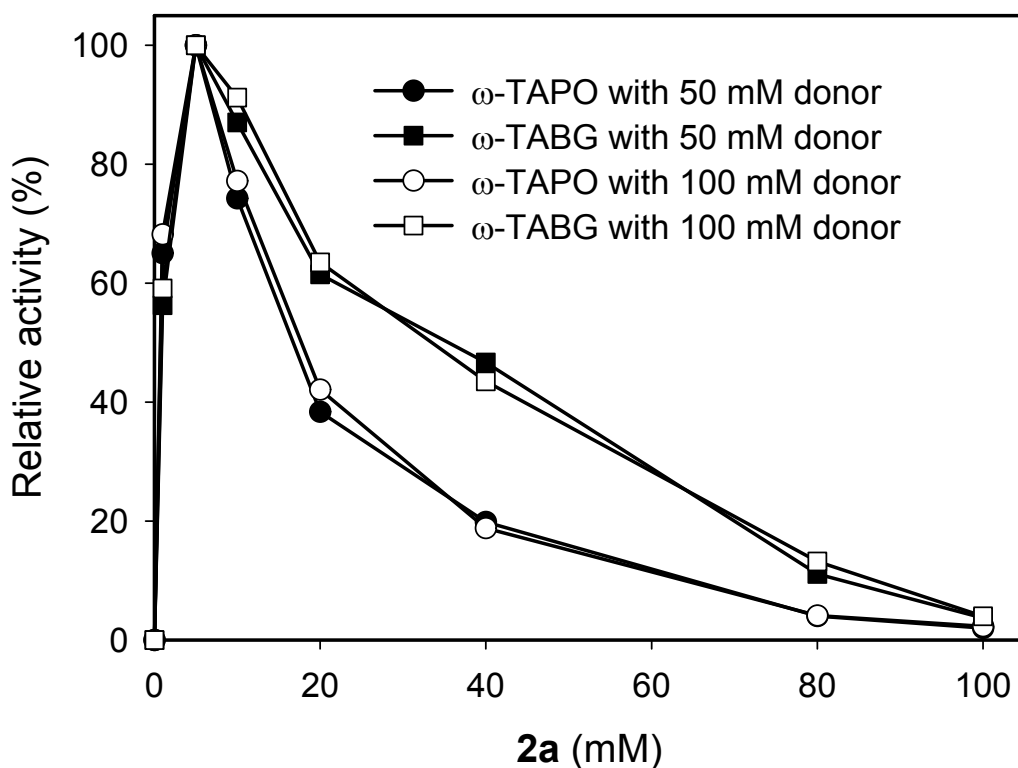

29 **Figure S3.** Asymmetric syntheses were carried out in 1 mL of 200 mM Tris/HCl buffer (pH 7.0)  
30 containing 50 mM (or 100 mM) (*S*)- $\alpha$ -MBA (amino donor), 0.1 mM PLP and different  
31 concentration of **2a** using purified  $\omega$ -TA (0.02 mgmL<sup>-1</sup>).

1  
2  
3  
4  
5  
6  
7  
8  
9  
10  
11  
12  
13  
14  
15

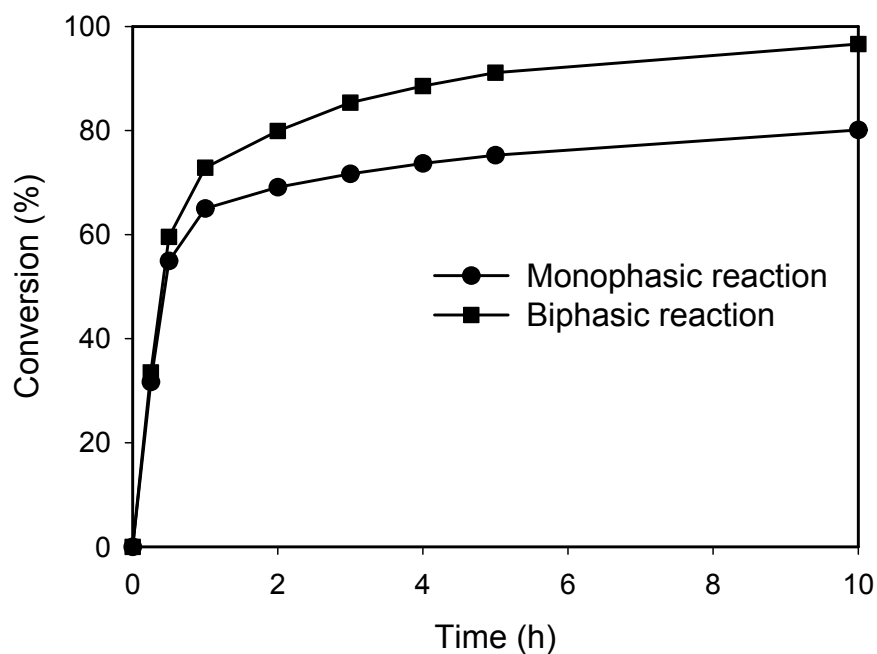

16 **Figure S4.** The asymmetric synthesis of (*S*)-**1a**. *Monophasic reaction condition*; 1 mL reaction  
17 volume, 10 mM **2a**, 20 mM (*S*)- $\alpha$ -MBA, 200 mM Tris/HCl buffer (pH 7.0) and  $\omega$ -TAPO (1.0  
18 mgmL<sup>-1</sup>) at 37°C. *Biphasic reaction condition*; 1 mL *iso*-octane was added to 1 mL of  
19 monophasic reaction mixture. The partition coefficient of acetophenone in *iso*-octane/water is  
20 12.9.<sup>[4]</sup>  
21

## 1 7. A preparative scale reaction and isolation of **1a**

2 Enzyme reactions were carried out at 37°C in 80 mL of 20 mM phosphate buffer (pH 7.0)  
3 containing 10 mM **2a**, 100 mM (*S*)- $\alpha$ -MBA, 0.1 mM PLP by using purified  $\omega$ -TAPO (8 mg), and  
4 40 mL *iso*-octane was added to 80 mL of aqueous reaction mixture. After 24h of reaction, the pH  
5 of aqueous reaction mixture adjusted to 1~2 by adding 10% perchloric acid and the resulting  
6 mixture was centrifuged to remove precipitate. To this mixture was added 2N NaOH (100mL),  
7 and pH of the resuting mixture was adjusted to 11~13. The mixture was concentrated (ca 20mL)  
8 at 50°C using rotary evaporator. This aqueous mixture was extracted with ethyl acetate (20mL  
9  $\times$ 3) and the organic phase containg (*S*)- $\alpha$ -MBA was disscarded. pH of the aqueous layer was  
10 adjusted to 1~3 using 1N HCl and the resulting acidified aqueous layer was again washed with  
11 ethyl acetate (20mL  $\times$ 3). The resulting aqueous layer was concentrated *in vacuo* to provide the  
12 crude residue as crystalline solid. This residue was then dissolved in a minimum amount of  
13 water, and then filtered through a cataion exchange resin (Dowex® 50W $\times$ 8, hydrogen form,  
14 5cm<sup>3</sup>) packed on Econo-Column® Chromatography Column. This was washed with distilled  
15 water until the pH of eluent is neutral. Then, the column was eluted with 1N ammonia water  
16 (30mL). Each eluent fraction was analyzed by thin-layer chromatography (TLC), and the  
17 fractions containing the product were combined and concentrated *in vacuo* to provide the (*S*)-**1a**  
18 as white crystalline solid. This was further recrystallized (water-methanol) to purify (*S*)-**1a** (53.5  
19 mg, 0.30 mmole, 38.3%). Optical purity was >99% *ee* (HPLC, Crownpak CR(+),  $t_R$  60min).

20

21

22 **4-Amino-4-phenylbutanoic acid ((*S*)-**1a**)**. (53.5mg, 38%); 99% *ee* (HPLC, Crownpak CR(+),  $t_R$   
23 55 min).  $[\alpha]_D^{25}$  [(*S*)-**1a** · HCl salt] = +5.33 ( $c$  = 0.2, MeOH), lit. <sup>[5]</sup>  $[\alpha]_D^{25}$  = +31.6 ( $c$  = 1.33,  
24 MeOH), lit. <sup>[6]</sup>  $[\alpha]_D^{25}$  = -39.4 ( $c$  = 0.2, CD<sub>3</sub>OD) for the (*R*) isomer]. <sup>1</sup>H NMR (600 MHz, D<sub>2</sub>O):  
25  $\delta$  7.42-7.28 (m, 5H), 4.17 (dd,  $J$  = 5.4, 9.0 Hz, 1H), 2.20-1.96 (m, 4H). <sup>13</sup>C NMR (150 MHz,  
26 D<sub>2</sub>O):  $\delta$  183.8, 138.6, 132.1, 132.0, 130.0, 57.9, 36.2, 32.9.

1  
2 **<sup>1</sup>H NMR**  
3

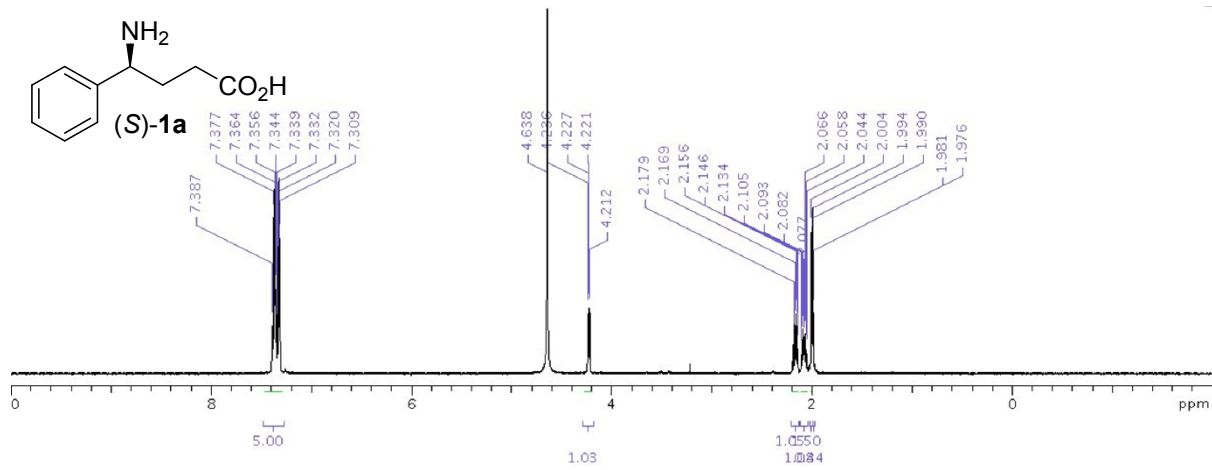

4  
5  
6  
7  
8  
9 **<sup>13</sup>C NMR**  
10

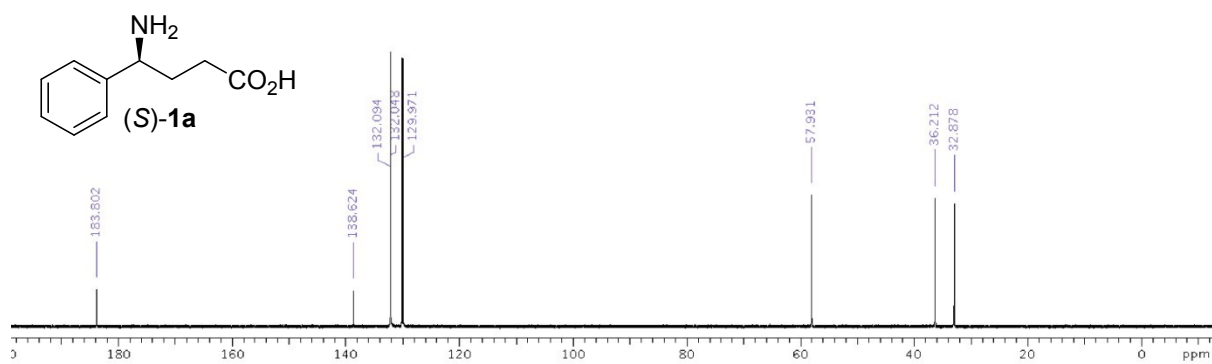

11

1  
2 **(S)-1a** (isolated from enzymatic reaction)

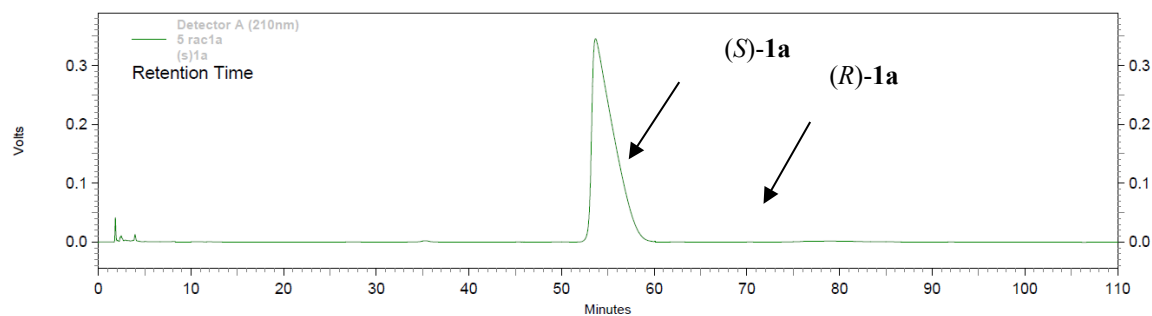

9 **rac-1a** (chemically synthesized)

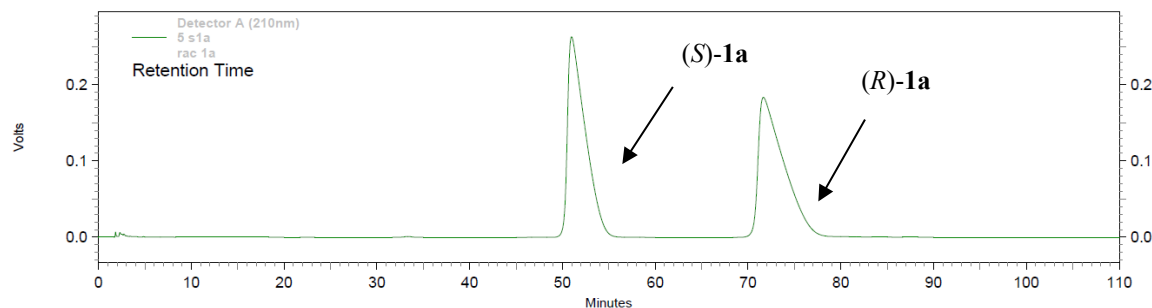

15 **References**

- 16 [1] H. S. Bea, H. J. Park, S. H. Lee, H. Yun, *Chem. Commun.* 2011, **47**, 5894-5896.  
17 [2] D. G. Allen, D. M. Coe, C. M. Cook, M. D. Dowle, C. D. Edlin, J. N. Hamblin, M. R.  
18 Johnson, P. S. Jones, M. K. Lindvall, C. J. Mitchell, A. J. Redgrave, J. E. Robinson, N.  
19 Trivedi, *Chem. Abstr.* 2005, **143**, 97353. PCT Int. Appl. WO/2005/058892, 2005.  
20 [3] Y. M. Seo, S. Mathew, H. S. Bea, Y. H. Khang, S. H. Lee, B. G. Kim, H. Yun, *Org. Biomol.*  
21 *Chem.* 2012, **10**, 2482-2485.  
22 [4] J.-S. Shin, B.-G. Kim, A. Liese, C. Wandrey, *Biotechnol. Bioeng.* 2001, **73**, 179-187;  
23 [5] F. Morlacchi, V. Losacco, V. Tortorella, *Gazz. Chim. Ital.* 1975, **105**, 349-354.  
24 [6] P. Oña-Burgos, I. Fernández, M. J. Iglesias, S. García-Granda, F. López-Ortiz, *Org. Lett.*  
25 2008, **10**, 537-540.
